# Supplementary material
Source: MDPI journal article supplement (https://www.mdpi.com/2071-1050/13/17/9663)
Supplement: s1 [file s1]

Table S1 Model-averaged parameter estimates (fixed effects) predicting implementation intensity of science class with nature activity.

| Variable                                                                                     | Elementary school teachers |      |         | Lower secondary school teachers |      |         |
|----------------------------------------------------------------------------------------------|----------------------------|------|---------|---------------------------------|------|---------|
|                                                                                              | Estimate                   | SE   | p-value | Estimate                        | SE   | p-value |
| <b><u>Time spent for whole of this unit</u></b>                                              |                            |      |         |                                 |      |         |
| Frequency of direct experiences of nature during childhood                                   | 0.04                       | 0.05 | 0.42    | 0.05                            | 0.06 | 0.42    |
| Nature relatedness                                                                           | 0.07                       | 0.05 | 0.18    | 0.08                            | 0.06 | 0.18    |
| Knowledge of species name                                                                    | 0.14                       | 0.05 | 0.01    | 0.18                            | 0.06 | 0.00    |
| University Education                                                                         | 0.03                       | 0.05 | 0.60    | 0.01                            | 0.06 | 0.82    |
| Teaching career                                                                              | 0.10                       | 0.05 | 0.07    | -0.01                           | 0.06 | 0.82    |
| Gender (male compared with female)                                                           | -0.05                      | 0.10 | 0.61    | -0.19                           | 0.13 | 0.15    |
| Greenspace within school                                                                     | 0.00                       | 0.06 | 0.99    | -0.01                           | 0.05 | 0.80    |
| Degree of urbanization of school                                                             | -0.02                      | 0.06 | 0.74    | -0.03                           | 0.06 | 0.56    |
| <b><u>Time spent for outdoor learning</u></b>                                                |                            |      |         |                                 |      |         |
| Frequency of direct experiences of nature during childhood                                   | 0.03                       | 0.04 | 0.46    | 0.02                            | 0.03 | 0.54    |
| Nature relatedness                                                                           | 0.08                       | 0.03 | 0.02    | 0.05                            | 0.03 | 0.13    |
| Knowledge of species name                                                                    | 0.05                       | 0.04 | 0.16    | 0.04                            | 0.03 | 0.23    |
| University Education                                                                         | 0.01                       | 0.03 | 0.73    | 0.04                            | 0.04 | 0.21    |
| Teaching career                                                                              | -0.04                      | 0.04 | 0.30    | -0.03                           | 0.03 | 0.44    |
| Gender (male compared with female)                                                           | 0.20                       | 0.07 | 0.00    | -0.02                           | 0.08 | 0.77    |
| Greenspace within school                                                                     | 0.05                       | 0.04 | 0.20    | 0.03                            | 0.03 | 0.23    |
| Degree of urbanization of school                                                             | -0.08                      | 0.04 | 0.07    | -0.02                           | 0.03 | 0.57    |
| <b><u>Frequency of recommendation to students to observe or touch insects and plants</u></b> |                            |      |         |                                 |      |         |
| Frequency of direct experiences of nature during childhood                                   | 0.01                       | 0.04 | 0.74    | 0.10                            | 0.05 | 0.04    |
| Nature relatedness                                                                           | 0.16                       | 0.04 | 0.00    | 0.17                            | 0.05 | 0.00    |
| Knowledge of species name                                                                    | 0.01                       | 0.04 | 0.72    | 0.08                            | 0.05 | 0.13    |
| University Education                                                                         | 0.01                       | 0.04 | 0.70    | 0.10                            | 0.05 | 0.05    |
| Teaching career                                                                              | -0.02                      | 0.04 | 0.73    | -0.01                           | 0.05 | 0.81    |
| Gender (male compared with female)                                                           | 0.07                       | 0.08 | 0.39    | 0.16                            | 0.11 | 0.16    |
| Greenspace within school                                                                     | 0.13                       | 0.05 | 0.01    | 0.06                            | 0.04 | 0.15    |
| Degree of urbanization of school                                                             | 0.04                       | 0.05 | 0.51    | -0.04                           | 0.05 | 0.46    |
| <b><u>Frequency of explanation to students about ecology of insects and plants</u></b>       |                            |      |         |                                 |      |         |
| Frequency of direct experiences of nature during childhood                                   | -0.03                      | 0.06 | 0.61    | 0.15                            | 0.06 | 0.01    |
| Nature relatedness                                                                           | 0.27                       | 0.06 | 0.00    | 0.14                            | 0.06 | 0.02    |
| Knowledge of species name                                                                    | 0.00                       | 0.06 | 0.94    | 0.12                            | 0.06 | 0.05    |
| University Education                                                                         | 0.10                       | 0.06 | 0.06    | 0.25                            | 0.06 | 0.00    |
| Teaching career                                                                              | -0.13                      | 0.06 | 0.03    | 0.01                            | 0.06 | 0.85    |

|                                                            |       |      |      |       |      |      |
|------------------------------------------------------------|-------|------|------|-------|------|------|
| Gender (male compared with female)                         | 0.30  | 0.11 | 0.01 | 0.05  | 0.14 | 0.73 |
| Greenspace within school                                   | 0.21  | 0.06 | 0.00 | 0.06  | 0.05 | 0.25 |
| Degree of urbanization of school                           | 0.24  | 0.06 | 0.00 | -0.07 | 0.06 | 0.22 |
| <b><u>Frequency of usage of specimens of organism</u></b>  |       |      |      |       |      |      |
| Frequency of direct experiences of nature during childhood | -0.01 | 0.07 | 0.87 | -0.05 | 0.09 | 0.59 |
| Nature relatedness                                         | 0.28  | 0.07 | 0.00 | 0.23  | 0.09 | 0.01 |
| Knowledge of species name                                  | 0.14  | 0.07 | 0.04 | 0.14  | 0.09 | 0.13 |
| University Education                                       | 0.01  | 0.07 | 0.86 | 0.09  | 0.09 | 0.33 |
| Teaching career                                            | -0.07 | 0.08 | 0.34 | 0.06  | 0.09 | 0.52 |
| Gender (male compared with female)                         | 0.25  | 0.13 | 0.06 | -0.32 | 0.20 | 0.10 |
| Greenspace within school                                   | 0.11  | 0.08 | 0.14 | 0.14  | 0.08 | 0.08 |
| Degree of urbanization of school                           | 0.22  | 0.08 | 0.01 | 0.01  | 0.09 | 0.91 |
| <b><u>Frequency of usage of movie about organisms</u></b>  |       |      |      |       |      |      |
| Frequency of direct experiences of nature during childhood | 0.10  | 0.07 | 0.14 | 0.04  | 0.07 | 0.59 |
| Nature relatedness                                         | 0.09  | 0.06 | 0.15 | 0.02  | 0.07 | 0.82 |
| Knowledge of species name                                  | -0.10 | 0.07 | 0.12 | 0.04  | 0.08 | 0.61 |
| University Education                                       | -0.03 | 0.06 | 0.61 | 0.13  | 0.08 | 0.10 |
| Teaching career                                            | -0.29 | 0.07 | 0.00 | 0.08  | 0.07 | 0.25 |
| Gender (male compared with female)                         | 0.01  | 0.12 | 0.94 | 0.22  | 0.17 | 0.19 |
| Greenspace within school                                   | 0.08  | 0.08 | 0.27 | 0.04  | 0.06 | 0.49 |
| Degree of urbanization of school                           | 0.14  | 0.09 | 0.10 | -0.03 | 0.07 | 0.65 |

---
